# Supplementary material
Source: PubMed Central journal article supplement (PMC8299021)

Figure S1. ROS production, apoptosis and cell cycle in U87MG cells. (A) Apoptosis was detected using flow cytometry. (B) ROS levels were detected using flow cytometry. (C) Cell cycle was detected using flow cytometry. Inc-NLC1-C, long non-coding RNA narcolepsy candidate region 1 gene C. ov, overexpression; sh, short hairpin RNA; NC, negative control; ROS, reactive oxygen species.

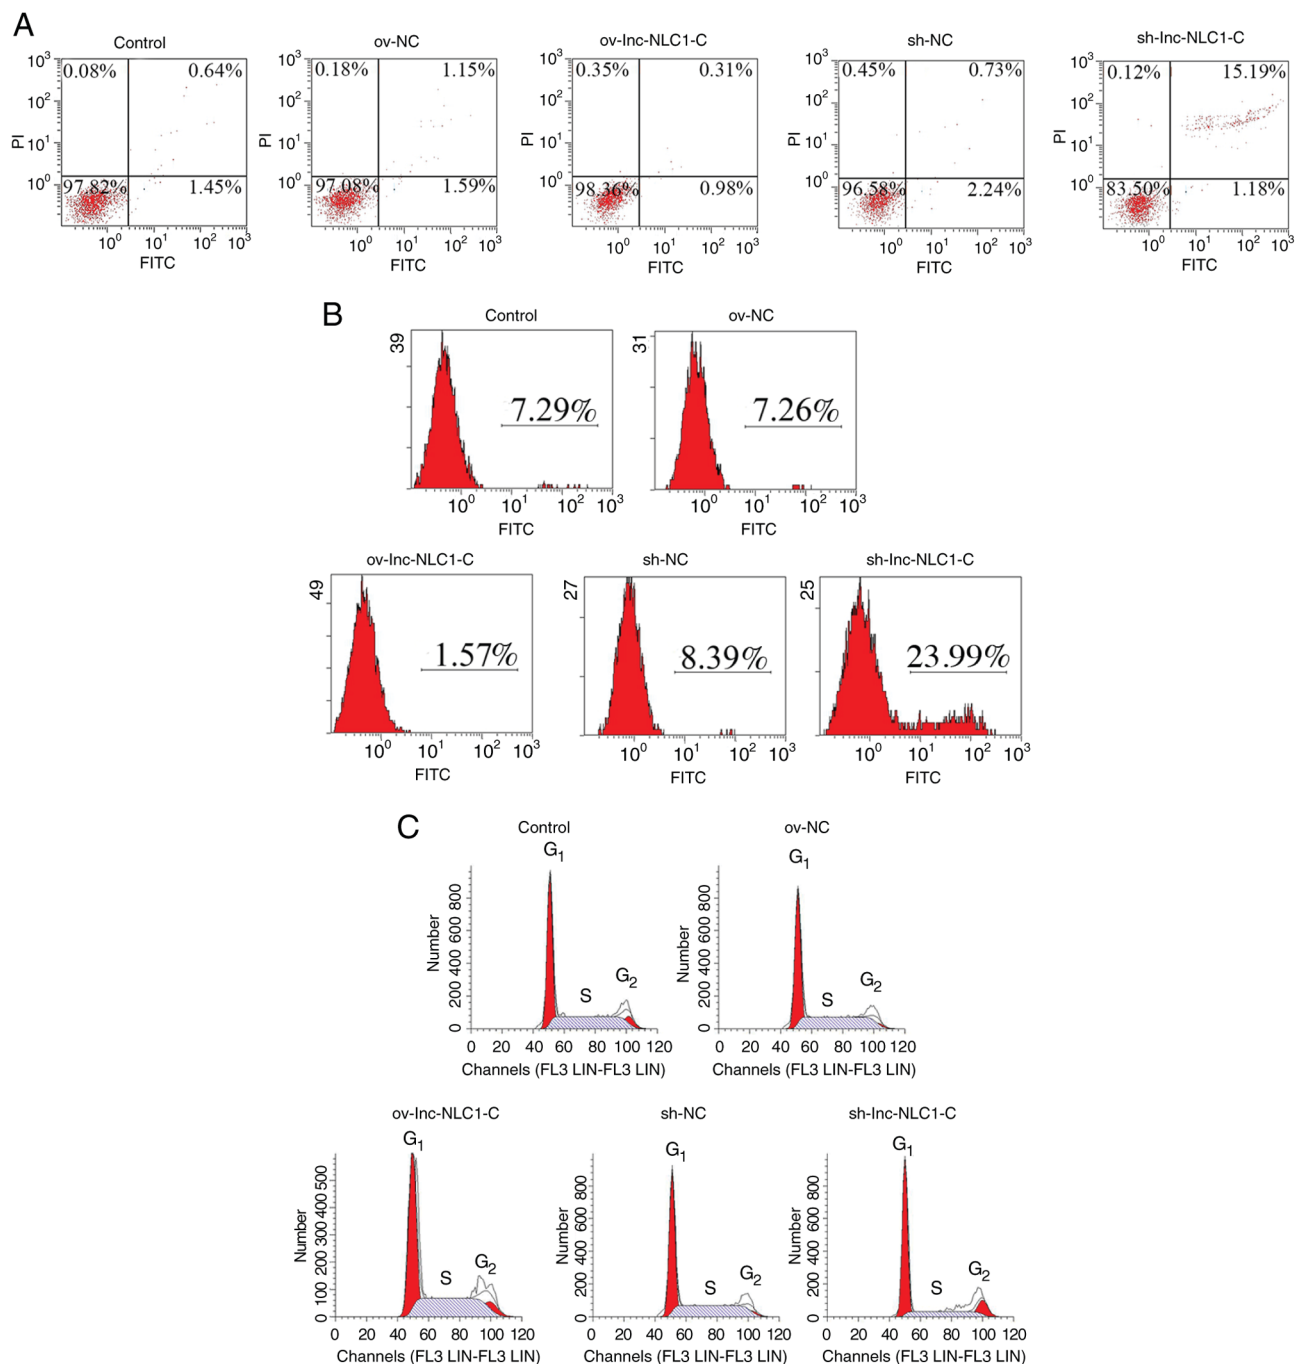

Supplement: Supplementary_Data.pdf [file Supplementary_Data.pdf]
